# Supplementary material for: Realizing high-rate aqueous zinc-ion batteries using organic cathode materials containing electron-withdrawing groups
Source: Royal Society of Chemistry journal article supplement (doi:10.1039/d2se00310d), 2022-01-01
Supplement: d2se00310d1.pdf [file d2se00310d1.pdf]

## Supporting Information

### Realizing high-rate aqueous zinc-ion battery using organic cathode material containing electron withdrawing group

Xiaojuan Chen<sup>a</sup>, Haoqi Su<sup>a</sup>, Baozhu Yang<sup>a</sup>, Gui Yin<sup>b</sup>, Qi Liu<sup>a,b\*</sup>

<sup>a</sup>Jiangsu Key Laboratory of Advanced Catalytic Materials and Technology, Advanced Catalysis Green Manufacturing Collaborative Innovation Center and School of Petrochemical Engineering, Changzhou University, 1 Gehu Road, Changzhou, Jiangsu 213164, China.

<sup>b</sup>State Key Laboratory of Coordination Chemistry, Nanjing University, Nanjing, Jiangsu 210093, China.

### Table of Contents

| No       | Title                                                                                                                                                          | Page      |
|----------|----------------------------------------------------------------------------------------------------------------------------------------------------------------|-----------|
| <b>1</b> | <b>Supporting Figures and Tables</b>                                                                                                                           | <b>P3</b> |
|          | <b>Figure S1.</b> Synthetic route of HFHATN                                                                                                                    | <b>P3</b> |
|          | <b>Figure S2.</b> Liquid state <sup>1</sup> H NMR of HFHATN.                                                                                                   | <b>P3</b> |
|          | <b>Figure S3.</b> Solid state <sup>13</sup> C NMR of HFHATN.                                                                                                   | <b>P3</b> |
|          | <b>Figure S4.</b> Mass spectra of HFHATN.                                                                                                                      | <b>P4</b> |
|          | <b>Figure S5.</b> FTIR spectra of HFHATN.                                                                                                                      | <b>P4</b> |
|          | <b>Figure S6.</b> XRD spectra of HFHATN.                                                                                                                       | <b>P4</b> |
|          | <b>Figure S7.</b> FESEM images of HFHATN samples.                                                                                                              | <b>P5</b> |
|          | <b>Figure S8.</b> Rate capability of HFHATN electrodes.                                                                                                        | <b>P5</b> |
|          | <b>Figure S9.</b> The performance of different loading of HFHATN electrode.                                                                                    | <b>P5</b> |
|          | <b>Figure S10.</b> Nyquist plot of EIS measurement for the Zn//HFHATN battery.                                                                                 | <b>P6</b> |
|          | <b>Figure S11.</b> Self-discharge behavior tested of HFHATN electrode.                                                                                         | <b>P6</b> |
|          | <b>Figure S12.</b> Ex-situ XPS spectra of HFHATN electrode                                                                                                     | <b>P7</b> |
|          | <b>Figure S13.</b> Ex-situ FT-IR spectra of HFHATN electrode.                                                                                                  | <b>P7</b> |
|          | <b>Figure S14.</b> Solid-state <sup>1</sup> H NMR spectra of the HFHATN electrode                                                                              | <b>P8</b> |
|          | <b>Figure S15.</b> XRD patterns of the pristine electrode and the discharge electrode and Zn <sub>4</sub> (OH) <sub>6</sub> SO <sub>4</sub> ·5H <sub>2</sub> O | <b>P8</b> |
|          | <b>Figure S16.</b> The images of the assembled flexible aqueous Zn//HFHATN battery.                                                                            | <b>P9</b> |
|          | <b>Figure S17.</b> The rate performances of flexible aqueous Zn//HFHATN                                                                                        | <b>P9</b> |

|          |            |                                                                                                                                                                            |            |
|----------|------------|----------------------------------------------------------------------------------------------------------------------------------------------------------------------------|------------|
|          |            | battery.                                                                                                                                                                   |            |
|          |            | <b>Figure S18.</b> The energy density and power density of the flexible Zn//HFHATN battery.                                                                                | <b>P10</b> |
|          |            | <b>Figure S19.</b> Flexible performance of the flexible Zn//HFHATN battery at bending degrees.                                                                             | <b>P10</b> |
|          |            | <b>Table S1.</b> Comparison of maximum specific capacity in aqueous zinc batteries.                                                                                        | <b>P11</b> |
|          |            | <b>Table S2.</b> Sum of electronic and zero-point energies in hartree calculated at the B3LYP/6-31+G (d, p) level.                                                         | <b>P12</b> |
|          |            | <b>Table S3.</b> Comparison of energy and power densities between present work and previous reported flexible batteries and supercapacitors.                               | <b>P12</b> |
| <b>2</b> |            | <b>Note</b>                                                                                                                                                                |            |
|          | <b>2.1</b> | <b>Calculation about energy density and power density for Zn full batteries and flexible Zn batteries</b>                                                                  | <b>P13</b> |
|          | <b>2.2</b> | <b>Calculation about the capacity contribution ratio from Zn<sup>2+</sup> and H<sup>+</sup> based on inductively coupled plasma atomic emission spectroscopy (ICP-AES)</b> | <b>P14</b> |
| <b>3</b> |            | <b>References</b>                                                                                                                                                          | <b>P15</b> |

## 1. Supporting Figures and Tables

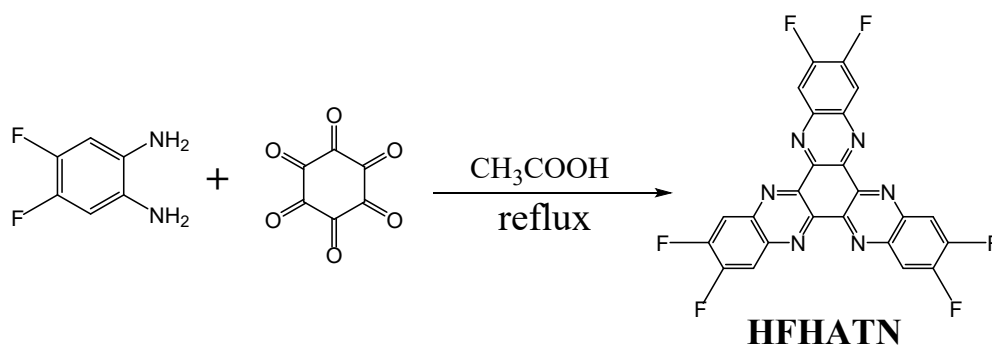

**Figure S1.** Synthetic route of HFHATN.

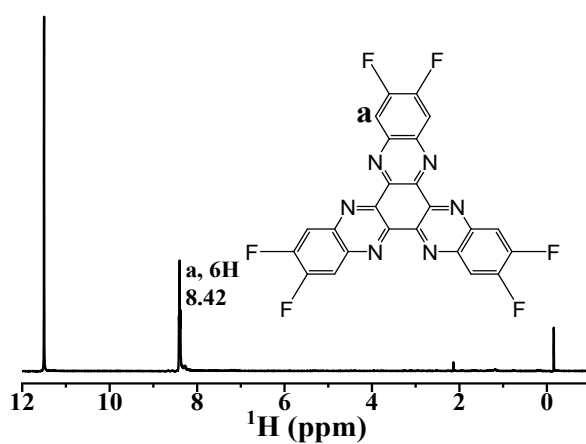

**Figure S2.** Liquid state  $^1\text{H}$  NMR spectrum of HFHATN.

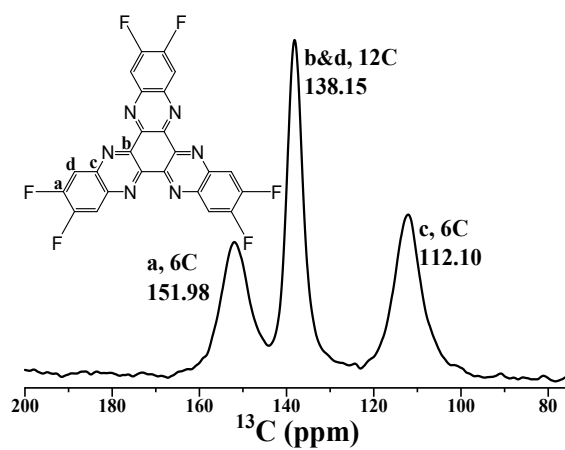

**Figure S3.** Solid state  $^{13}\text{C}$  NMR spectrum of HFHATN.

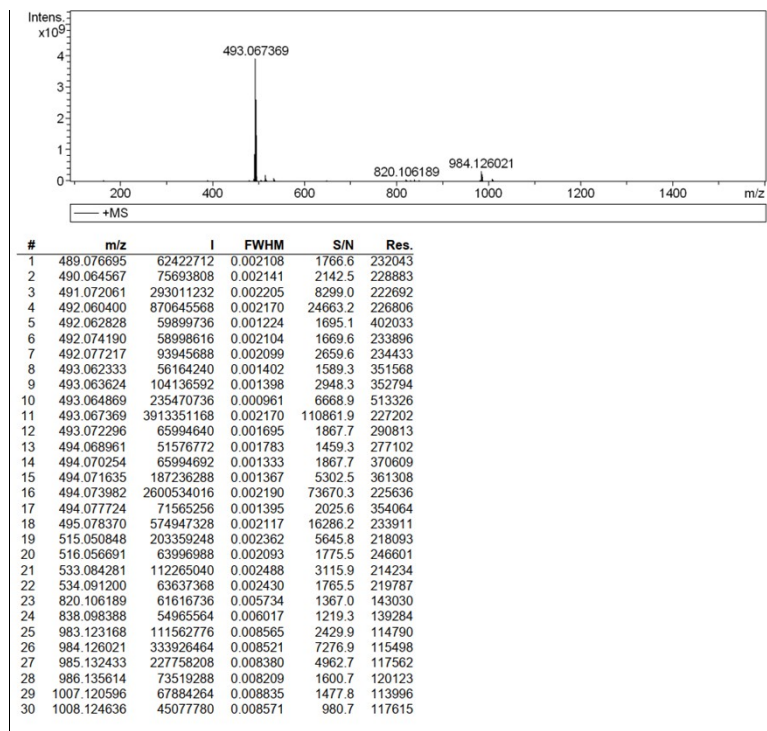

Figure S4. Mass spectrum of HFHATN.

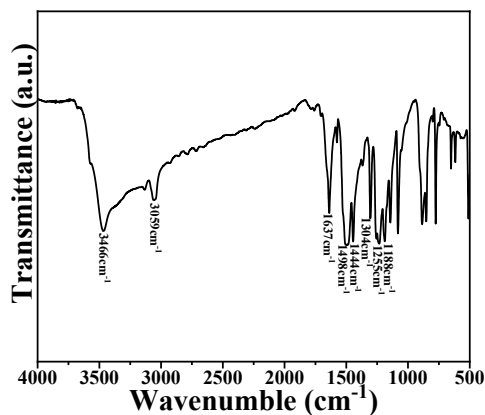

Figure S5. FTIR spectrum of HFHATN.

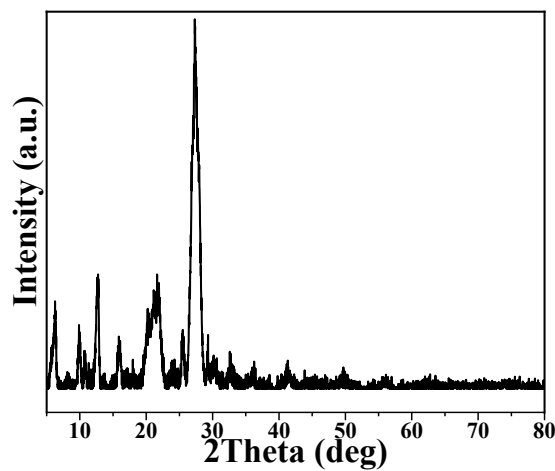

Figure S6. XRD spectrum of HFHATN.

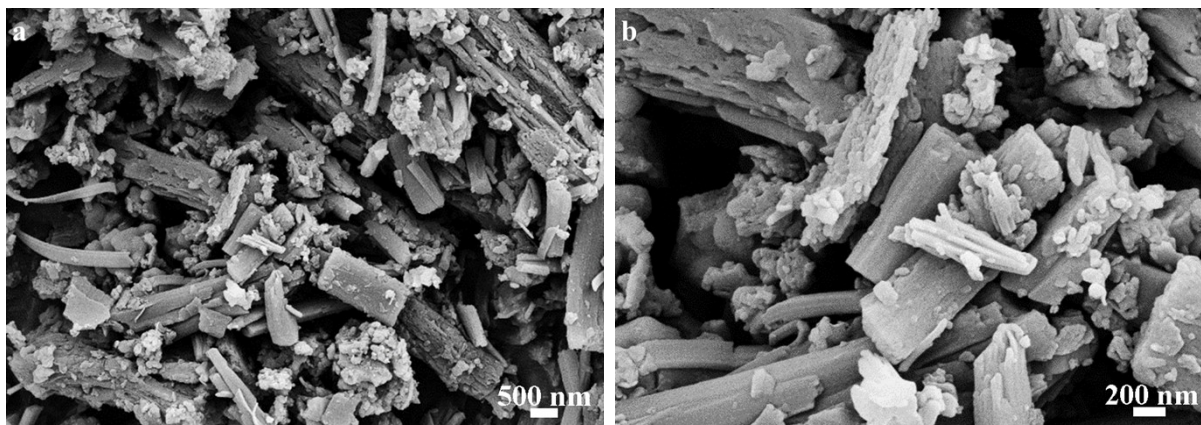

**Figure S7.** FESEM images of the HFHATN material (a) lower magnification (b) higher magnification.

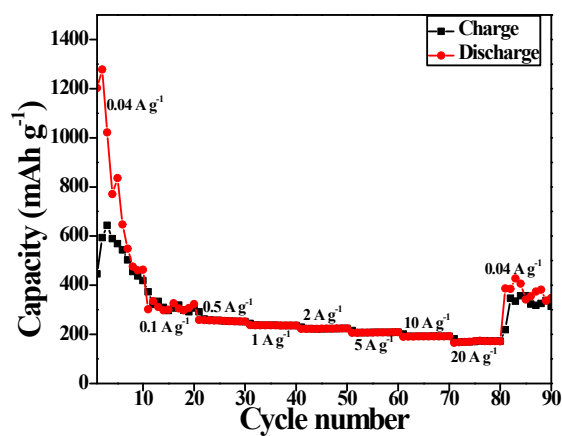

**Figure S8.** Rate capability of HFHATN electrode at various current densities.

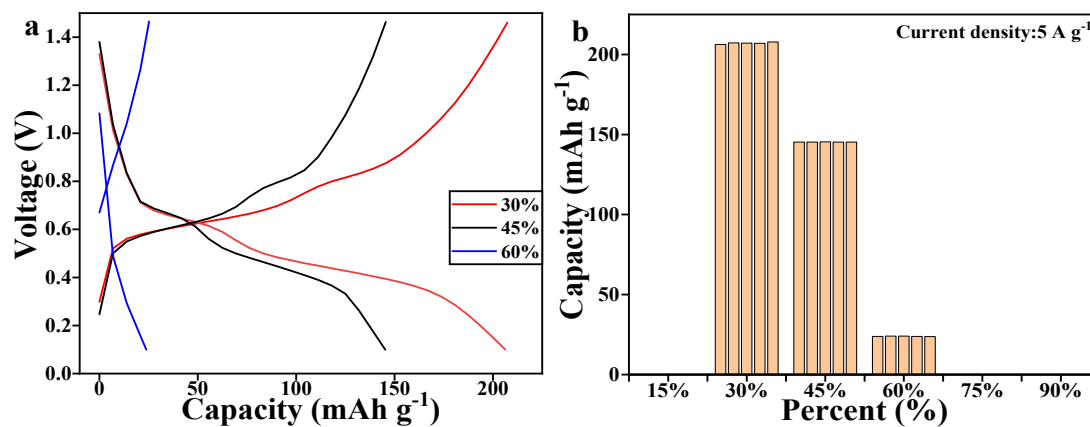

**Figure S9.** Galvanostatic discharge/charge curves (a) and discharge histogram (b) of HFHATN electrode with different loading of active materials at a current density of  $5 \text{ A g}^{-1}$ .

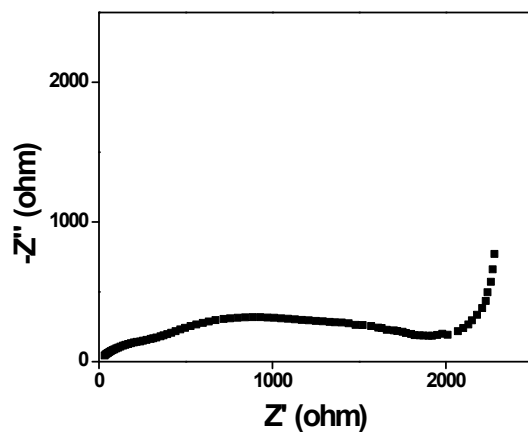

**Figure S10.** Nyquist plot of EIS measurement for the Zn//HFHATN battery.

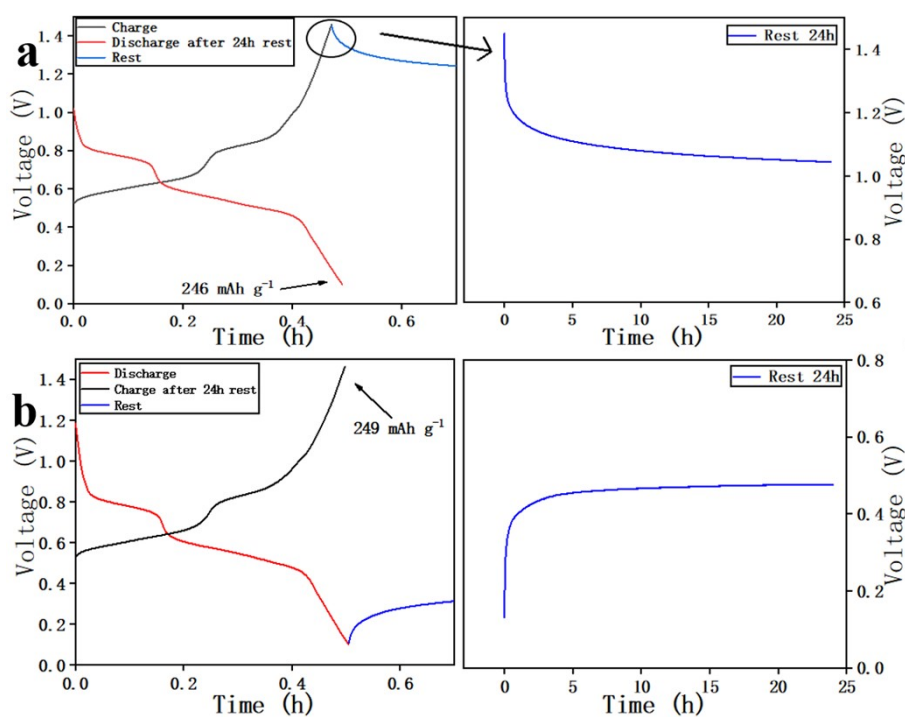

**Figure S11.** Self-discharge behavior tested of HFHATN electrode at a current density of  $0.5 \text{ A g}^{-1}$ , (a) when firstly charged to 1.46 V, and then discharged to 0.1 V after rest for 24 hours, and (b) when firstly discharged to 0.1 V, and then charged to 1.46 V after rest for 24 hours

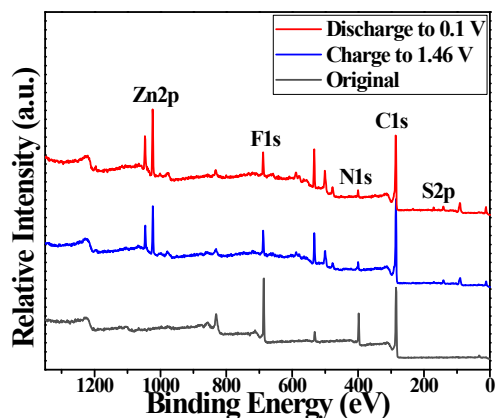

**Figure S 12.** Ex-situ XPS spectra of HFHATN electrode at pristine, fully discharged (0.1 V) and fully charged (1.46 V) states in a discharge/charge cycle. An aqueous coin battery was tested at a current density of  $0.5 \text{ A g}^{-1}$  for examination.

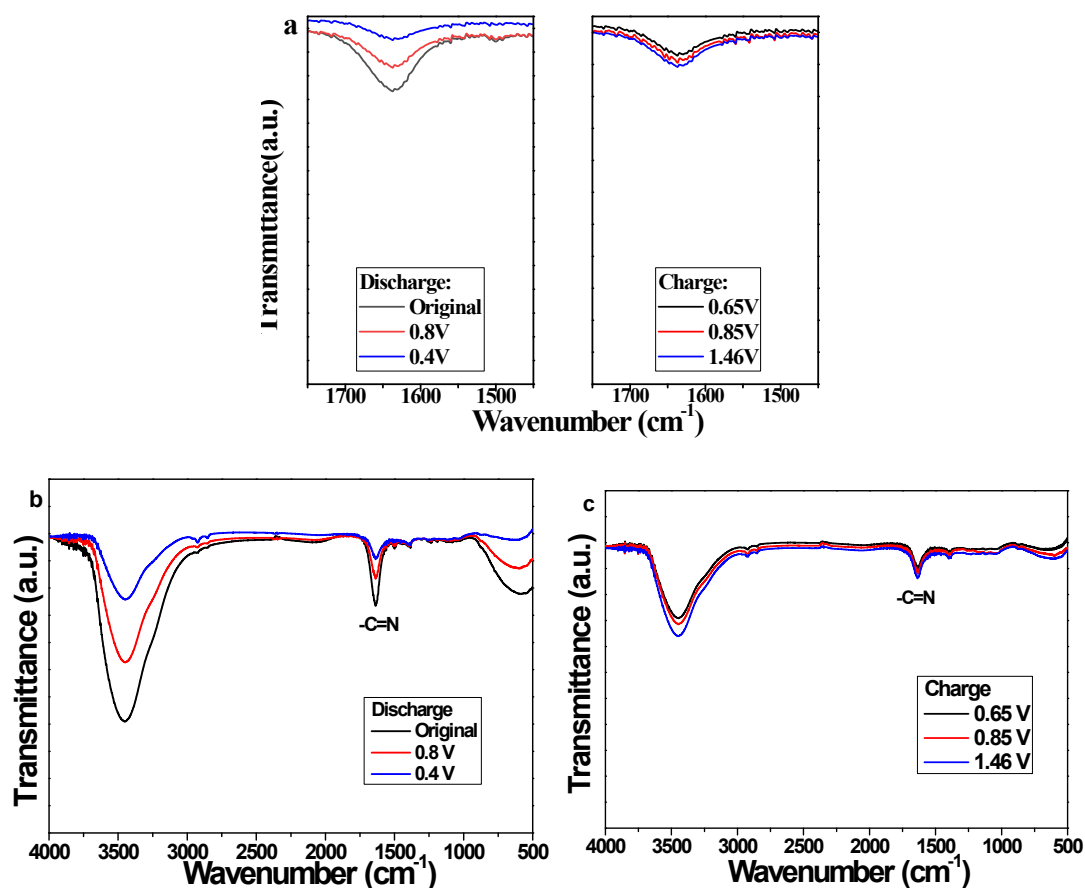

**Figure S 13.** Ex-situ FT-IR spectra of HFHATN electrode (a, b, c) at pristine, fully discharged (0.1 V) and fully charged (1.46 V) states in a discharge/charge cycle. An aqueous coin cell was tested at a current density of  $0.5 \text{ A g}^{-1}$  for examination.

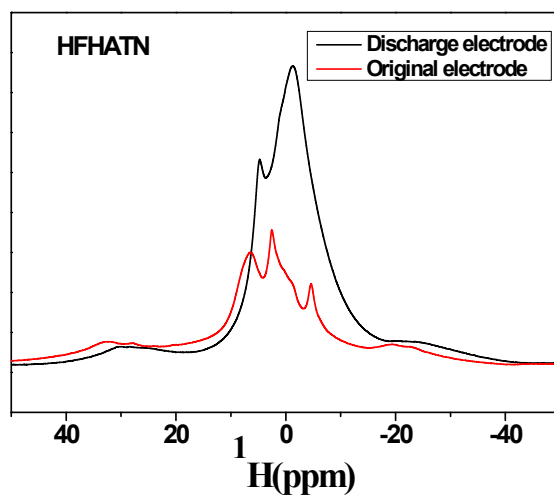

**Figure S14.** Solid-state <sup>1</sup>H NMR spectra of the HFHATN electrode under the original and discharge conditions

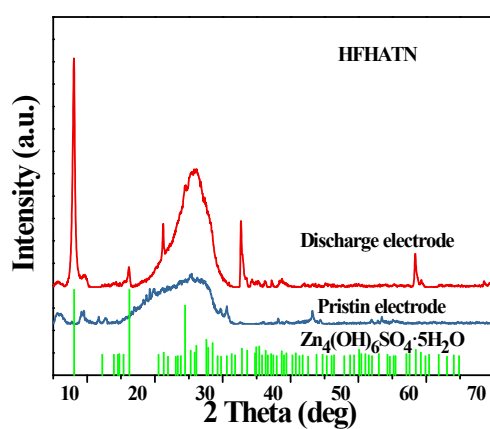

**Figure S15.** XRD patterns of the pristine electrode and the discharge electrode and  $Zn_4(OH)_6SO_4 \cdot 5H_2O$  (PDF no 39-0688)



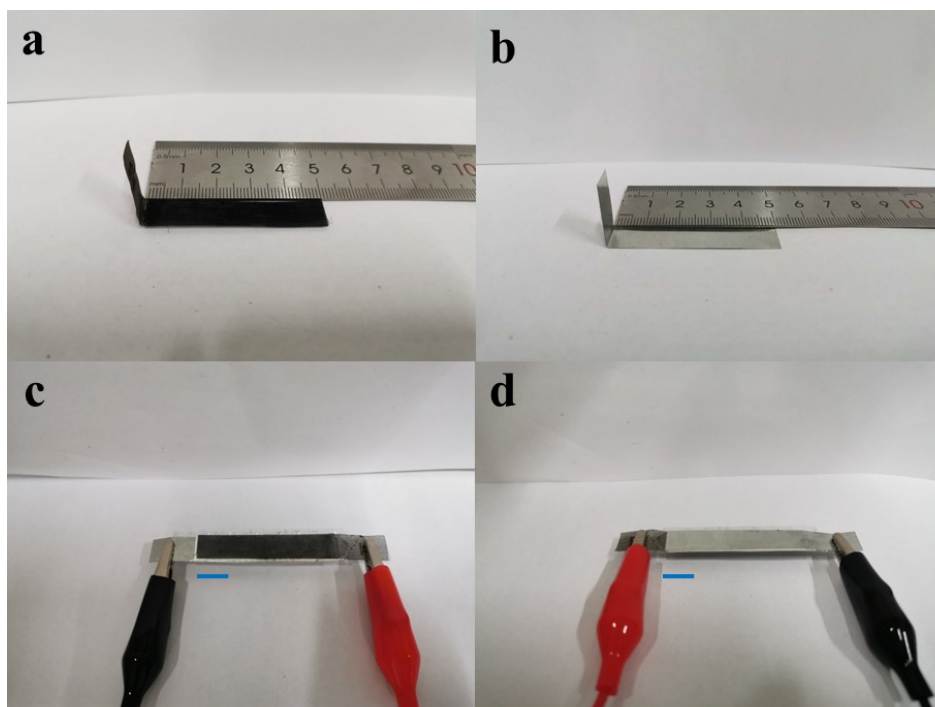

**Figure S16.** The images of the assembled flexible aqueous Zn//HFHATN battery. HFHATN cathode material (a) and Zn foil (b) in size of  $1\text{cm} \times 5\text{cm}$ . The cathode-side-view (c) and the anode-side-view (d) of the flexible battery. (scale bar: 1cm)

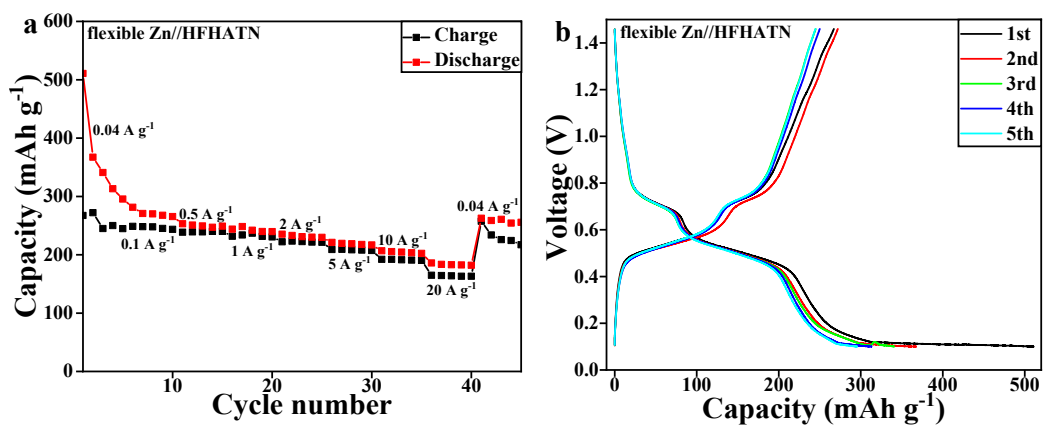

**Figure S17.** (a) The rate performances of flexible aqueous Zn//HFHATN battery. (b) The galvanostatic discharge/charge curves of flexible aqueous Zn//HFHATN battery at a current density of  $0.04\text{ A g}^{-1}$ .

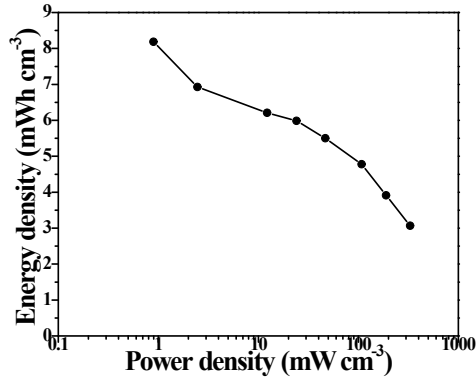

**Figure S18.** The Ragone plot of the flexible Zn//HFHATN battery.

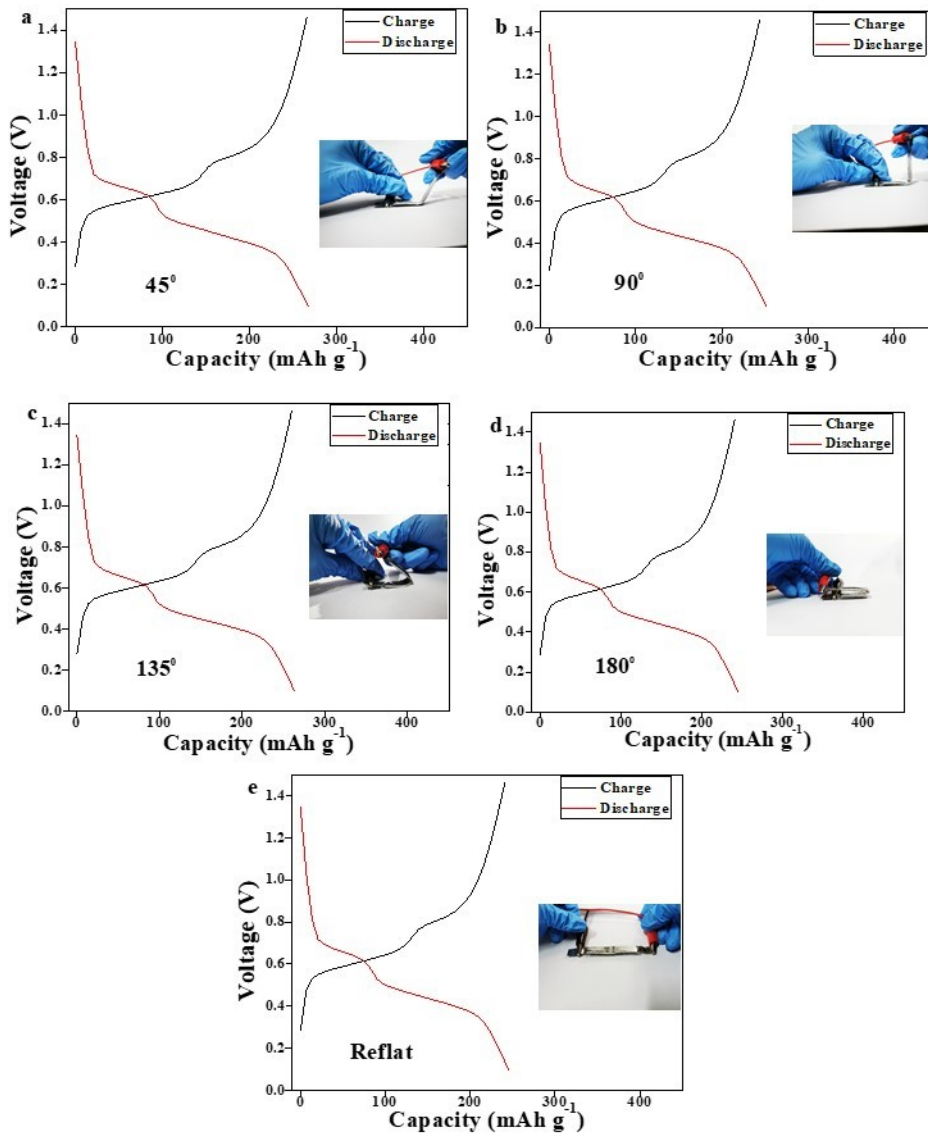

**Figure S19** Flexible performance of the flexible Zn//HFHATN battery at bending degrees of (a) 45°, (b) 90° (c) 135°, (d) 180° and (e) reflat. The insets are optical images of the flexible aqueous battery at corresponding bending degrees.

**Table S1.** Comparison of specific capacity in aqueous zinc batteries.

| Electrode Materials      | Specific capacity<br>(Current density)<br>/mA h g <sup>-1</sup> (mA g <sup>-1</sup> ) | Voltage<br>/ (V vs Zn/Zn <sup>2+</sup> ) | Refs.     |
|--------------------------|---------------------------------------------------------------------------------------|------------------------------------------|-----------|
| Quinone(C4Q)             | 333 (50)                                                                              | 0.8—1.3 V                                | 24        |
| Pyrene-4,5,9,10-tetraone | 336 (40)                                                                              | 0.36—1.46V                               | 25        |
| p-chloranil              | >200 (217)                                                                            | 0.8—1.4V                                 | 23        |
| DTT                      | 211/97 (50/2000)                                                                      | 0.3-1.4 V                                | 27        |
| NDI                      | ~200/~25(0.2/10 C)                                                                    | 0.2-1.0 V                                | 28        |
| HATN                     | 963/174 (40/6000)                                                                     | 0.1—1.46V                                | 32        |
| HMHATN                   | 542/115 (40/8000)                                                                     | 0.1—1.46V                                | 32        |
| HATN                     | 405/123 (100/20000)                                                                   | 0.3-1.1 V                                | 33        |
| HATN-3CN                 | 313/190 (50/20000)                                                                    | 0.1-1.6 V                                | 34        |
| TCNAQ                    | 166/55(50/1000)                                                                       | 0.6-1.8 V                                | 35        |
| PQ-Δ                     | 225/210 (30/150)                                                                      | 0.25-1.6 V                               | 29        |
| PDB                      | 205/176 (50 /1000)                                                                    | 0.2-1.55                                 | 30        |
| PA-COF                   | 265/68 (50/10000)                                                                     | 0.2-1.6 V                                | 36        |
| BDB                      | 125 (25)                                                                              | 0.6-1.8 V                                | S1        |
| PC/G-2                   | 355/ 171 (50/5000)                                                                    | 0.2-1.9 V                                | S2        |
| PANI                     | 184/110 (20/10000)                                                                    | 0.5-1.6 V                                | S3        |
| PANI                     | 200/ 89 (50/5000)                                                                     | 0.5-1.5 V                                | S4        |
| PDA                      | 126.2/43.2(20/5000)                                                                   | 0.3-1.4 V                                | S5        |
| PBQS                     | 203/126 (20/1000)                                                                     | 0.2-1.8 V                                | S6        |
| HqTp                     | 276/125 (85/3750)                                                                     | 0.2-1.8 V                                | S7        |
| HFHATN                   | 461/172 (40/20000)                                                                    | 0.1-1.46 V                               | This work |

Refs. 19- ---30 was given in the main-text

**Table S2** Sum of electronic and zero-point energies in hartree calculated at the B3LYP/6-31+G (d, p) level.

|            | Energy/Hartree |
|------------|----------------|
| Zn         | -1779.1040434  |
| H          | -0.2151804     |
| HFHATN     | -1845.7542577  |
| HFHATN_3Zn | -7183.21715873 |

$$1 \text{ hartree} = 2625.5 \text{ kJ/mol} = 27.21 \text{ eV} = 627.51 \text{ kcal/mol}$$

**Table S3.** Comparison of energy and power densities between present work and previous reported flexible batteries and supercapacitors.

| Flexible Materials                                                                                           | Energy Density<br>(mWh cm <sup>-3</sup> ) | Power Density<br>(W cm <sup>-3</sup> ) | Refs. |
|--------------------------------------------------------------------------------------------------------------|-------------------------------------------|----------------------------------------|-------|
| HZnO@MnO <sub>2</sub> SSC                                                                                    | 0.04                                      | 0.00024                                | S8    |
| MWCNT/CMF SSC                                                                                                | 0.14                                      | 0.0027                                 | S9    |
| H-TiO <sub>2</sub> @MnO <sub>2</sub> //H-TiO <sub>2</sub> @C ASC                                             | 0.30                                      | 0.23                                   | S10   |
| Graphite/PANI SSC                                                                                            | 0.32                                      | 0.054                                  | S11   |
| MVNN/CNT SSC                                                                                                 | 0.54                                      | 0.43                                   | S12   |
| MnO <sub>2</sub> //Fe <sub>2</sub> O <sub>3</sub> ASC                                                        | 0.55                                      | 0.139                                  | S13   |
| VO <sub>x</sub> //VN ASC                                                                                     | 0.61                                      | 0.85                                   | S14   |
| Co <sub>3</sub> O <sub>4</sub> //graphene ASC                                                                | 0.62                                      | 1.47                                   | S15   |
| ppy-coated paper SSC                                                                                         | 1                                         | 0.27                                   | S16   |
| WO <sub>3-x</sub> /MoO <sub>3-x</sub> //PANI ASC                                                             | 1.9                                       | 0.73                                   | S17   |
| Ni(OH) <sub>2</sub> NM//OMC fibers ASC                                                                       | 2.16                                      | 1.6                                    | S18   |
| PANI/Au ASC                                                                                                  | 10                                        | 3                                      | S19   |
| MWCNT//Li <sub>4</sub> Ti <sub>5</sub> O <sub>12</sub> ASC                                                   | 3.85                                      | 0.565                                  | S20   |
| ppy-MnO <sub>2</sub> -CF SSC                                                                                 | 6.16                                      | 0.4                                    | S21   |
| SWCNT/N-rGO microfibers SSC                                                                                  | 6.3                                       | 1.085                                  | S22   |
| LiMn <sub>2</sub> O <sub>4</sub> //Li <sub>4</sub> Ti <sub>5</sub> O <sub>12</sub> planar battery            | 10                                        | ---                                    | S23   |
| LiCoO <sub>2</sub> //LiPON//Li battery                                                                       | 2.2                                       | ---                                    | S24   |
| LiMn <sub>2</sub> O <sub>4</sub> //Li <sub>4</sub> Ti <sub>5</sub> O <sub>12</sub> wire battery              | 17.7                                      | 0.56                                   | S25   |
| Na <sub>0.44</sub> MnO <sub>2</sub> //NaTi <sub>2</sub> (PO <sub>4</sub> ) <sub>3</sub> battery              | 23.8                                      | 3.8                                    | S26   |
| Li <sub>1.1</sub> Mn <sub>2</sub> O <sub>4</sub> //LiTi <sub>2</sub> (PO <sub>4</sub> ) <sub>3</sub> battery | 124                                       | 11.1                                   | S27   |
| Zn//Ni-NiO@CF battery                                                                                        | 0.67                                      | ---                                    | S28   |
| ZnO@CC//NiO@CC battery                                                                                       | 7.76                                      | 0.54                                   | S29   |

|                    |       |       |           |
|--------------------|-------|-------|-----------|
| PTO//Zn battery    | 38.72 | 1.70  | 25        |
| HATN//Zn battery   | 22.9  | 0.069 | 32        |
| HMHATN//Zn battery | 19.2  | 0.067 | 32        |
| HFHATN//Zn battery | 8.2   | 0.33  | This work |

**Note:** In the above table, *ASC* represents “asymmetric supercapacitor”, and *SSC* represents “symmetric supercapacitor”. In addition, Refs. 25 and 32 were given in the main-text. Refs. S1 to S29 are given in following Supplemental References section.

## 2. Note

### 2.1 Calculation about energy density and power density for Zn full batteries and flexible Zn batteries

In the main text, the current densities and specific capacities are calculated according to the mass of the active organic materials in the cathode. The detailed calculation about energy density and power density of Zn full batteries and flexible Zn batteries are presented as follows:

1. Calculation of the discharge capacity (mA h): The discharge specific capacity (mA h g<sup>-1</sup>) multiplied by the mass of the active materials (m, g).

$$C = \text{Specific capacity} \times m \quad (1)$$

2. The calculation of the consumed zinc foil quality (g): The discharge capacity (mA h) was divided by the theoretical specific capacity of zinc (820 mA h/g).

$$m (\text{Zn}) = C/820 \quad (2)$$

3. Calculation of the energy density of Zn full/flexible battery is based following equation:

$$E = C \times V \times 1000/m \quad (3)$$

Where E, C, V and m stand for energy density (Wh kg<sup>-1</sup>), the discharge capacity (mAh), the average discharge voltage (V) and the total mass of the cathode (active organic material) and anode (the consumed Zn) (kg), respectively.

4. Calculation of the power density of Zn full/flexible battery is based following equation:

$$P = E/t \quad (4)$$

Where P is the power density ( $W\ kg^{-1}$ ), E is the energy density ( $Wh\ kg^{-1}$ ) and t is the discharge time (h).

5. Calculation of the volume energy density of flexible Zn battery is based following equation:

$$E_{vol} = C \times V / v \quad (5)$$

Where  $E_{vol}$ , C, V and v stand for the volume energy density ( $mWh\ cm^{-3}$ ), the discharge capacity (mAh), the average discharge voltage (V), and the volume of the flexible Zn battery ( $cm^3$ ), respectively.

6. Calculation of the volume power density of flexible Zn battery is based following equation:

$$P = E_{vol} / t \quad (6)$$

Where P is the volume power density ( $mW\ cm^{-3}$ ),  $E_{vol}$  is the volume energy density ( $mWh\ cm^{-3}$ ) and t is the discharge time (h).

## 2.1 Calculation about the capacity contribution ratio from $Zn^{2+}$ and $H^+$ based on inductively coupled plasma atomic emission spectroscopy (ICP-AES)

Mass ratio of Zn and S = 53978.7 : 1681

$$\text{Mass ratio of Zn and S} = \frac{53978.7}{65.39} : \frac{1682}{32.065}$$

Molar ratio of coordinated  $Zn^{2+}$  and  $Zn_4(OH)_6SO_4 \cdot H_2O$

$$= \left( \frac{53978.7}{65.39} - 4 * \frac{1682}{32.065} \right) : \frac{1682}{32.065}$$

Molar ratio of coordinated  $Zn^{2+}$  and  $H^+$

$$= \left( \frac{53978.7}{65.39} - 4 * \frac{1682}{32.065} \right) : \left( 6 * \frac{1682}{32.065} \right)$$

Capacity contribution ratio from  $Zn^{2+}$  and  $H^+$

$$= 2 * \left( \frac{53978.7}{65.39} - 4 * \frac{1682}{32.065} \right) : \left( 6 * \frac{1682}{32.065} \right)$$

Based on above calculation, the capacity contribution from  $Zn^{2+}$  is about 79.7% and that from  $H^+$  is about 20.3%.

### 3. References

- S1. H. Glatz, E. Lizundia, F. Pacifico and D. Kundu, *ACS Appl. Energy Mater.*, 2019, **2**, 1288-1294.
- S2. S. Zhang, W. Zhao, H. Li and Q. Xu, *ChemSusChem*, 2020, **13**, 188-195.
- S3. H. Y. Shi, Y. J. Ye, K. Liu, Y. Song and X. Sun, *Angew. Chem. Int. Ed.*, 2018, **57**, 16359-16363.
- S4. F. Wan, L. Zhang, X. Wang, S. Bi, Z. Niu and J. Chen, *Adv. Funct. Mater.*, 2018, **28**, 1804975.
- S5. X. Yue, H. Liu and P. Liu, *Chem. Commun.*, 2019, **55**, 1647-1650.
- S6. G. Dawut, Y. Lu, L. Miao and J. Chen, *Inorg. Chem. Front.*, 2018, **5**, 1391-1396.
- S7. A. Khayum, M. Ghosh, V. Vijayakumar, A. Halder, M. Nurhuda, S. Kumar, M. Addicoat, S. Kurungot and R. Banerjee, *Chem. Sci.*, 2019, **10**, 8889-8894
- S8. P. Yang, X. Xiao, Y. Li, Y. Ding, P. Qiang, X. Tan, W. Mai, Z. Lin, W. Wu, T. Li, H. Jin, P. Liu, J. Zhou, C. P. Wong and Z. L. Wang, *ACS Nano.*, 2013, **7**, 2617-2626.
- S9. V. T. Le, H. Kim, A. Ghosh, J. Kim, J. Chang, Q. A. Vu, D. T. Pham, J. H. Lee, S. W. Kim and Y. H. Lee, *ACS Nano.*, 2013, **7**, 5940-5947.
- S10. X. Lu, M. Yu, G. Wang, T. Zhai, S. Xie, Y. Ling, Y. Tong and Y. Li, *Adv. Mater.*, 2013, **25**, 267-272.
- S11. B. Yao, L. Yuan, X. Xiao, J. Zhang, Y. Qi, J. Zhou, J. Zhou, B. Hu and W. Chen. *Nano Energy.*, 2013, **2**, 1071-1078.
- S12. X. Xiao, X. Peng, H. Jin, T. Li, C. Zhang, B. Gao, B. Hu, K. Huo and J. Zhou. *Adv. Mater.*, 2013, **25**, 5091-5097.
- S13. P. Yang, Y. Ding, Z. Lin, Z. Chen, Y. Li, P. Qiang, M. Ebrahimi, W. Mai, C. P. Wong and Z. L.

- Wang. *Nano Lett.*, 2014, **14**, 731-736.
- S14. X. Lu, M. Yu, T. Zhai, G. Wang, S. Xie, T. Liu, C. Liang, Y. Tong and Y. Li. *Nano Lett.*, 2013, **13**, 2628-2633.
- S15. X. Wang, B. Liu, R. Liu, Q. Wang, X. Hou, D. Chen, R. Wang and G. Shen, *Angew. Chem. Int. Ed.*, 2014, **53**, 1849-1853.
- S16. L. Yuan, B. Yao, B. Hu, K. Huo, W. Chen and J. Zhou, *Energy Environ Sci.*, 2013, **6**, 470.
- S17. X. Xiao, T. Ding, L. Yuan, Y. Shen, Q. Zhong, X. Zhang, Y. Cao, B. Hu, T. Zhai, L. Gong, J. Chen, Y. Tong, J. Zhou and Z. L. Wang, *Adv. Energy Mater.*, 2012, **2**, 1328-1332.
- S18. X. Dong, Z. Guo, Y. Song, M. Hou, J. Wang, Y. Wang and Y. Xia, *Adv. Funct. Mater.*, 2014, **24**, 3405-3412.
- S19. L. Yuan, X. Xiao, T. Ding, J. Zhong, X. Zhang, Y. Shen, B. Hu, Y. Huang, J. Zhou and Z. L. Wang, *Angew. Chem. Int. Ed.*, 2012, **51**, 4934-4938.
- S20. W. Zuo, C. Wang, Y. Li and J. Liu, *Sci. Rep.*, 2015, **5**, 7780.
- S21. J. Tao, N. Liu, W. Ma, L. Ding, L. Li, J. Su and Y. Gao, *Sci. Rep.*, 2013, **3**, 2286.
- S22. D. Yu, K. Goh, H. Wang, L. Wei, W. Jiang, Q. Zhang, L. Dai and Y. Chen, *Nat. Nanotechnology.*, 2014, **9**, 555-562.
- S23. Y. Yang, S. Jeong, L. Hu, H. Wu, S. W. Lee and Y. Cui, *P. Natl. Acad. Sci. USA.*, 2011, **108**, 13013-13018.
- S24. M. Koo, K. I. Park, S. H. Lee, M. Suh, D. Y. Jeon, J. W. Choi, K. Kang and K. J. Lee, *Nano Lett.*, 2012, **12**, 4810-4816.
- S25. J. Ren, Y. Zhang, W. Bai, X. Chen, Z. Zhang, X. Fang, W. Weng, Y. Wang and H. Peng, *Angew. Chem. Int. Ed.*, 2014, **53**, 7864-7869.



- S26. Z. Guo, Y. Zhao, Y. Ding, X. Dong, L. Chen, J. Cao, C. Wang, Y. Xia, H. Peng and Y. Wang, *Chem.*, 2017, **3**, 348-362.
- S27. X. Dong, L. Chen, X. Su, Y. Wang and Y. Xia, *Angew. Chem. Int. Ed.*, 2016, **128**, 7600-7603.
- S28. Y. Zeng, Y. Meng, Z. Lai, X. Zhang, M. Yu, P. Fang, M. Wu, Y. Tong, and X. Lu, *Adv. Mater.*, 2017, **29**, 1702698
- S29. J. Liu, C. Guan, C. Zhou, Z. Fan, Q. Ke, G. Zhang, C. Liu, and J. Wang, *Adv. Mater.*, 2016, **28**, 8732-8739.
